# Supplementary material for: Chemical synthesis of high quality epitaxial vanadium dioxide films with sharp electrical and optical switch properties
Source: Royal Society of Chemistry journal article supplement (doi:10.1039/c5tc01811k), 2015-01-01
Supplement: c5tc01811k1.pdf [file c5tc01811k1.pdf]

Journal of Materials Chemistry C. Electronic Supplementary Information.

## **Chemical synthesis of high quality epitaxial vanadium dioxide films with sharp electrical and optical switch properties**

A. M. Makarevich,<sup>a,b,‡</sup> I. I. Sadykov,<sup>a</sup> D. I. Sharovarov,<sup>c</sup> V. A. Amelichev,<sup>b</sup> A. A. Adamenkov,<sup>b</sup> D. M. Tsymbarenko,<sup>a</sup> A. V. Plokhii,<sup>c</sup> M. N. Esaulkov,<sup>d</sup> P. M. Solyankin<sup>e</sup> and A. R. Kaul<sup>a,b</sup>

<sup>a</sup>Lomonosov Moscow State University, Department of Chemistry, Moscow, Russia 119991.

<sup>b</sup>SuperOx, 20/2 Nauchnyi proezd, Moscow, Russia 117246

<sup>c</sup>Lomonosov Moscow State University, Department of Materials Science, Moscow, Russia 119991

<sup>d</sup>Institute of Laser and Information Technologies RAS, Shatura, Russia 140700

<sup>e</sup>Lomonosov Moscow State University, Department of Physics, Moscow, Russia 119991

<sup>‡</sup>E-mail: makarevich@inorg.chem.msu.ru, Tel: +7 495 939 38 36

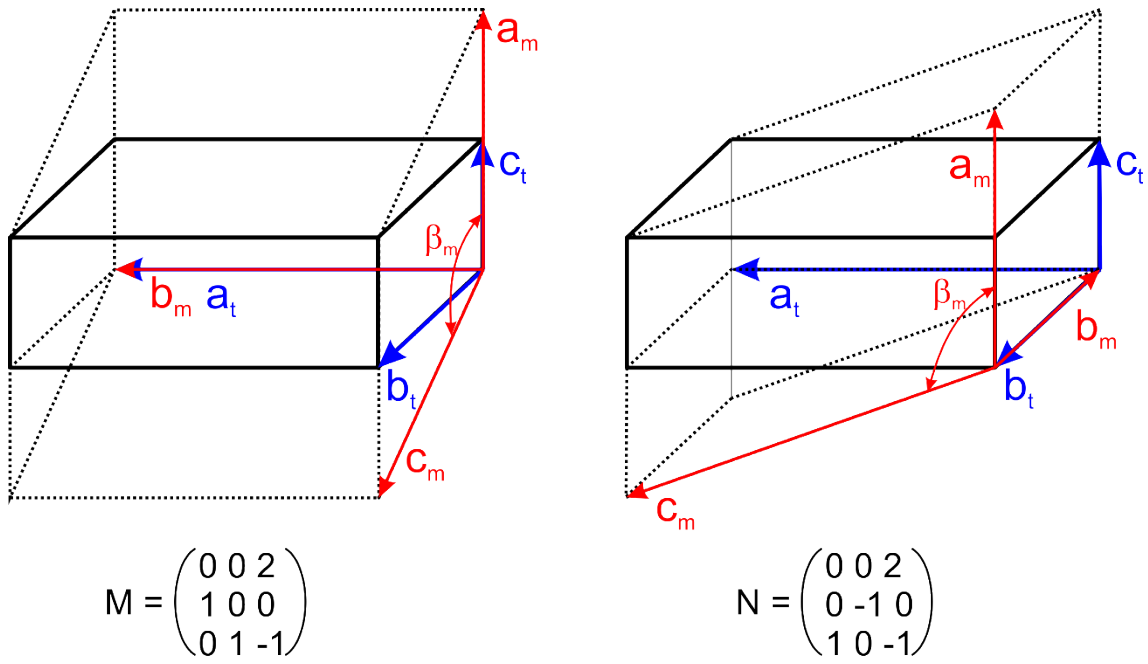

Fig. S1. The two variants of transition from tetragonal VO<sub>2</sub>(R) (solid lines) to monoclinic VO<sub>2</sub>(M) (dashed lines) crystal cells. The transition matrixes are marked as “M” and “N”.

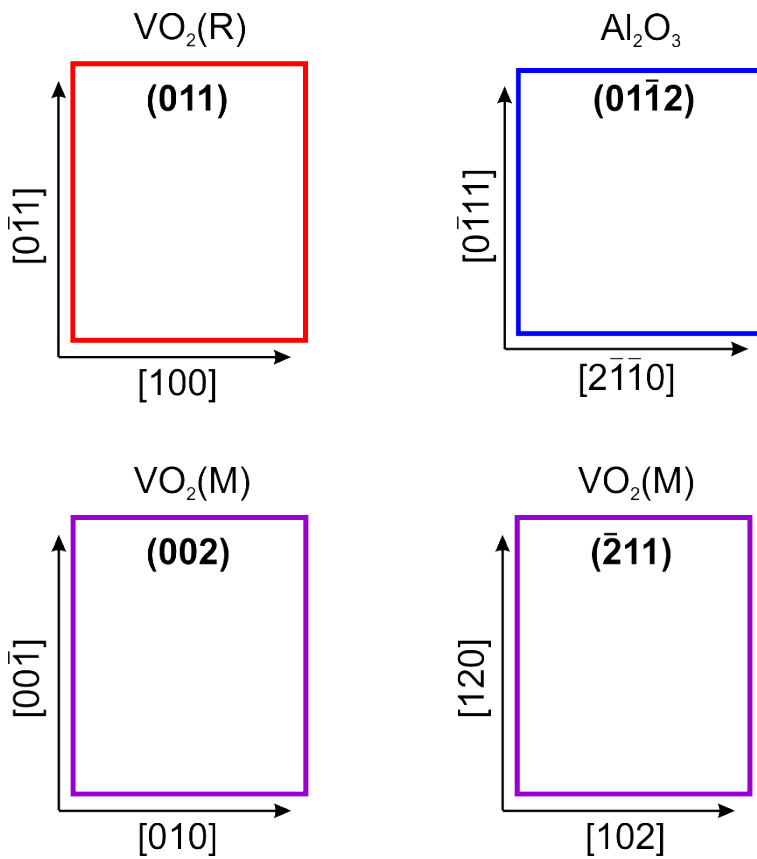

Fig. S2. The epitaxial growth of VO<sub>2</sub>(R) and VO<sub>2</sub>(M) (two variants) films on r-Al<sub>2</sub>O<sub>3</sub> substrate.
